# Supplementary material for: Validating ICD-10 codes for adverse drug events in hospitalised older adults: protocol for a cross-sectional study
Source: HighWire-hosted journal article supplement (doi:10.1136/bmjopen-2022-062853), 2022-11-01
Supplement: bmjopen-2022-062853supp001_data_supplement.pdf [file bmjopen-2022-062853supp001_data_supplement.pdf]

## ICD-10 Code List

## Level 1

| <b>ICD-10 Code</b> | <b>Description</b>                                                                                                     |
|--------------------|------------------------------------------------------------------------------------------------------------------------|
| T39.1X1A           | Poisoning by 4-aminophenol derivatives, accidental (unintentional), initial encounter                                  |
| T39.1X2A           | Poisoning by 4-aminophenol derivatives, intentional self-harm, initial encounter                                       |
| T39.1X3A           | Poisoning by 4-aminophenol derivatives, assault, initial encounter                                                     |
| T40.2X1A           | Poisoning by other opioids, accidental (unintentional), initial encounter                                              |
| T40.2X2A           | Poisoning by other opioids, intentional self-harm, initial encounter                                                   |
| T40.2X5A           | Adverse effect of other opioids, initial encounter                                                                     |
| T43.211A           | Poisoning by selective serotonin and norepinephrine reuptake inhibitors, accidental (unintentional), initial encounter |
| T43.212A           | Poisoning by selective serotonin and norepinephrine reuptake inhibitors, intentional self-harm, initial encounter      |
| T43.215A           | Adverse effect of selective serotonin and norepinephrine reuptake inhibitors, initial encounter                        |
| T43.3X5A           | Adverse effect of phenothiazine antipsychotics and neuroleptics, initial encounter                                     |
| T43.4X5A           | Adverse effect of butyrophenone and thiothixene neuroleptics, initial encounter                                        |
| T43.501A           | Poisoning by unspecified antipsychotics and neuroleptics, accidental (unintentional), initial encounter                |
| T43.505A           | Adverse effect of unspecified antipsychotics and neuroleptics, initial encounter                                       |
| T43.591A           | Poisoning by other antipsychotics and neuroleptics, accidental (unintentional), initial encounter                      |
| T43.592A           | Poisoning by other antipsychotics and neuroleptics, intentional self-harm, initial encounter                           |
| T43.595A           | Adverse effect of other antipsychotics and neuroleptics, initial encounter                                             |
| T43.595S           | Adverse effect of other antipsychotics and neuroleptics, sequela                                                       |
| T45.0X1A           | Poisoning by anti-allergic and antiemetic drugs, accidental (unintentional), initial encounter                         |
| T45.0X2A           | Poisoning by anti-allergic and antiemetic drugs, intentional self-harm, initial encounter                              |
| T45.0X3A           | Poisoning by anti-allergic and antiemetic drugs, assault, initial encounter                                            |
| T45.0X4A           | Poisoning by anti-allergic and antiemetic drugs, undetermined, initial encounter                                       |
| T45.0X5A           | Adverse effect of anti-allergic and antiemetic drugs, initial encounter                                                |
| T46.5X1A           | Poisoning by other antihypertensive drugs, accidental (unintentional), initial encounter                               |
| T46.5X2A           | Poisoning by other antihypertensive drugs, intentional self-harm, initial encounter                                    |
| T46.5X5A           | Adverse effect of other antihypertensive drugs, initial encounter                                                      |
| T39.1X4A           | Poisoning by 4-aminophenol derivatives, undetermined, initial encounter                                                |
| T39.1X5A           | Adverse effect of 4-aminophenol derivatives, initial encounter                                                         |
| T43.214A           | Poisoning by selective serotonin and norepinephrine reuptake inhibitors, undetermined, initial encounter               |
| T40.2X4A           | Poisoning by other opioids, undetermined, initial encounter                                                            |
| T40.411A           | Poisoning by fentanyl or fentanyl analogs, accidental (unintentional), initial encounter                               |
| T40.415A           | Adverse effect of fentanyl or fentanyl analogs, initial encounter                                                      |
| T43.594A           | Poisoning by other antipsychotics and neuroleptics, undetermined, initial encounter                                    |

## ICD-10 Code List

## Level 2

| <u>ICD-10 Code</u> | <u>Description</u>                                                                                | <u>ICD-10 Code</u> | <u>Description</u>                                           |
|--------------------|---------------------------------------------------------------------------------------------------|--------------------|--------------------------------------------------------------|
| E86                | Volume depletion                                                                                  | I15.8              | Other secondary hypertension                                 |
| E87                | Other disorders of fluid, electrolyte and acid-base balance                                       | I15.9              | Secondary hypertension, unspecified                          |
| E87.1              | Hypoosmolality and hyponatremia                                                                   | I44                | Atrioventricular and left bundle branch block                |
| E87.4              | Mixed disorder of acid-base balance                                                               | I45.8              | Other specified conduction disorders                         |
| E87.5              | Hypokalemia                                                                                       | I45.81             | Long QT syndrome                                             |
| E87.7              | Fluid overload                                                                                    | I46.1              | Sudden cardiac death                                         |
| E87.8              | Other disorders of electrolyte and fluid balance, not elsewhere classified                        | I47.2              | Ventricular tachycardia                                      |
| F05                | Delirium, not induced by alcohol and other psychoactive substances                                | I49.0              | Ventricular fibrillation                                     |
| F11                | Mental and behavioral disorders due to use of opioids                                             | I49.9              | Cardiac arrhythmia                                           |
| F13                | Mental and behavioral disorders due to use of sedatives or hypnotics                              | I95                | Hypotension                                                  |
| F19                | Mental and behavioral disorders due to multiple drug use and use of other psychoactive substances | I95.1              | Orthostatic hypotension                                      |
| G21.0              | Malignant Neuroleptic Syndrome                                                                    | I95.2              | Hypotension due to drugs                                     |
| G21.1              | Other drug-induced secondary parkinsonism                                                         | K59.03             | Drug induced constipation                                    |
| G21.2              | Secondary parkinsonism due to other external agents                                               | K71                | Toxic Liver Disease                                          |
| G24.0              | Drug-induced dystonia                                                                             | K71.1              | Toxic Liver Disease with hepatic necrosis                    |
| G25                | Essential Tremor                                                                                  | K71.2              | Toxic Liver Disease with acute hepatitis                     |
| G25.1              | Drug-induced tremor                                                                               | K71.6              | Toxic Liver Disease with hepatitis, not elsewhere classified |
| G25.3              | Myoclonus                                                                                         | K71.9              | Toxic Liver Disease, unspecified                             |
| G25.6              | Drug-induced tics and other tics of organic origin                                                | K72.0              | Acute and subacute hepatic failure                           |
| G40.5              | Special epileptic syndromes                                                                       | K72.9              | Hepatic failure, unspecified                                 |
| G44.4              | Drug-induced headache, not elsewhere classified                                                   | L29                | Pruritus                                                     |
| G71.1              | Myotonic disorders                                                                                | N17                | Acute renal failure                                          |
| G72                | Drug-induced myopathy                                                                             | N19                | Unspecified kidney failure                                   |
| G92                | Toxic encephalopathy                                                                              | R00.1              | Bradycardia                                                  |
| G93.4              | Encephalopathy, unspecified                                                                       | R06                | Abnormalities of breathing                                   |
| G93.41             | Metabolic encephalopathy                                                                          | R06.0              | Dyspnea                                                      |
| H53                | Visual disturbances                                                                               | R06.03             | Acute respiratory distress                                   |

## ICD-10 Code List

## Level 2

| <b>ICD-10 Code</b> | <b>Description</b>                                                    |
|--------------------|-----------------------------------------------------------------------|
| R09.02             | Hypoxemia                                                             |
| R09.2              | Respiratory Arrest                                                    |
| R11                | Nausea and vomiting                                                   |
| R17                | Unspecified jaundice                                                  |
| R33.0              | Drug induced retention of urine                                       |
| R33.8              | Other retention of urine                                              |
| R33.9              | Retention of urine, unspecified                                       |
| R40                | Somnolence, stupor and coma                                           |
| R41                | Other symptoms and signs involving cognitive functions and awareness  |
| R41.0              | Disorientation, unspecified                                           |
| R42                | Dizziness and giddiness                                               |
| R44                | Other symptoms and signs involving general sensations and perceptions |
| R44.0              | Auditory hallucinations                                               |
| R44.1              | Visual hallucinations                                                 |
| R44.2              | Other hallucinations                                                  |
| R44.3              | Hallucinations, unspecified                                           |
| R51                | Headache                                                              |
| R55                | Syncope and collapse                                                  |
| R74                | Elevations of levels of transaminase and lactic acid dehydrogenase    |
