# Supplementary material for: Validating ICD-10 codes for adverse drug events in hospitalised older adults: protocol for a cross-sectional study
Source: HighWire-hosted journal article supplement (doi:10.1136/bmjopen-2022-062853), 2022-11-01
Supplement: bmjopen-2022-062853supp002_data_supplement.pdf [file bmjopen-2022-062853supp002_data_supplement.pdf]

| Medication Module Triggers        |                                                              | + | Event Description and Harm Category (E-I) |
|-----------------------------------|--------------------------------------------------------------|---|-------------------------------------------|
| M4                                | Glucose less than 50mg/dL                                    |   |                                           |
| M5                                | Rising BUN or serum creatinine greater than 2 times baseline |   |                                           |
| M7                                | Diphenhydramine (Benadryl) use                               |   |                                           |
| M9                                | Naloxone (Narcan) use                                        |   |                                           |
| M10                               | Anti-emetic use                                              |   |                                           |
| M11                               | Over-sedation/hypotension                                    |   |                                           |
| M12                               | Abrupt Medication stop                                       |   |                                           |
| Custom Medication Module Triggers |                                                              | + | Event Description and Harm Category (E-I) |
| M14                               | Dantrolene use                                               |   |                                           |
| M15                               | IV Hydralazine use                                           |   |                                           |
| M16                               | IV Fluid Bolus                                               |   |                                           |
| M17                               | Atropine use                                                 |   |                                           |
| M18                               | Enema, disimpaction, or methylnaltrexone use                 |   |                                           |
| M19                               | Tamsulosin use (new start)                                   |   |                                           |
| M20                               | Hydroxyzine use                                              |   |                                           |
| M21                               | Bilirubin > 1.5 x ULN                                        |   |                                           |
| M22                               | AST/ALT >2x ULN                                              |   |                                           |
| M23                               | Potassium < 3 or > 5                                         |   |                                           |
| M24                               | Right Upper Quadrant Ultrasound                              |   |                                           |
| M25                               | CT Head                                                      |   |                                           |
| M26                               | Delirium/Confusion                                           |   |                                           |

| Cares Module Triggers            |                                                       | + | Event Description and Harm Category (E-I) |
|----------------------------------|-------------------------------------------------------|---|-------------------------------------------|
| C2                               | Code/arrest/RRT                                       |   |                                           |
| C3                               | Acute Dialysis                                        |   |                                           |
| C7                               | Patient Fall                                          |   |                                           |
| C8                               | Patient Ulcers                                        |   |                                           |
| C9                               | Readmission within 30 days                            |   |                                           |
| C10                              | Restraint Use                                         |   |                                           |
| C13                              | Transfer to higher level of care                      |   |                                           |
| Custom Cares Module Triggers     |                                                       | + | Event Description and Harm Category (E-I) |
| C16                              | CPAP/BiPAP new start, Oxygen new start                |   |                                           |
| C17                              | Catheterization (Foley, Straight Cath) and PVR checks |   |                                           |
| C18                              | 1:1 Therapeutic Companion or Video Monitoring         |   |                                           |
| C19                              | Epic Search: Tremor, Parkinsonism, Clonus             |   |                                           |
| Intensive Care Module Triggers   |                                                       | + | Event Description and Harm Category (E-I) |
| I2                               | Readmission to ICU                                    |   |                                           |
| I4                               | Intubation/Re-intubation                              |   |                                           |
| Custom Consult Triggers          |                                                       | + | Event Description and Harm Category (E-I) |
| H1                               | Neurology Consult                                     |   |                                           |
| H2                               | Cardiology Consult                                    |   |                                           |
| H3                               | Geriatrics Consult                                    |   |                                           |
| H4                               | Psychiatry Consult                                    |   |                                           |
| Other Triggers or Adverse Events |                                                       | + | Event Description and Harm Category (E-I) |
| O1                               | Other                                                 |   |                                           |

Patient Identifier \_\_\_\_\_

Total Events \_\_\_\_\_

LOS \_\_\_\_\_

## Harm Identification Qualification:

E – Temporary harm to the patient and required intervention F – Temporary harm to the patient and required initial or prolonged hospitalization

G – Permanent patient harm H - Intervention required to sustain life I – Patient death
